# Supplementary material for: Plant Regeneration Through Somatic Embryogenesis in Two Cultivars of Pineapple (Ananas Comosus L.)
Source: Research Square preprint supplement (doi:10.21203/rs.3.rs-542908/v1), 2021-06-02
Supplement: Supplementary file 1 [file 3cda1a4d56647eb2aaa06f8a.xlsx]

## Sheet: ANOVA Table 4
	Stoma frequency and dimensions of stomata and ostioles in Smooth cayenne and Sugar loaf.
			Statistic analysis				Newman-Keuls (SNK) comparison
					LaSto (µm) : Width of the stomata
			R²	0.967		Cultigroupe	Mean		Grouping
			F	156.35		Cay FVPEmS	19.82	A
			Pr > F	0.0197		PSFVPEmS	22		B
						PSFVPT	30.822			C
						CayFVPT	35.6				D
																		LaCG	LoOS	LaOS	Nbr de Sto/
																R²		0.967014569873713		0.787343389680269	0.845303867403315
																F		156.354215166545		19.7462225070171	29.1428571428571
					Nbr of Sto/ µm2 : Number of stomata per square micrometer leaf area											Pr > F		< 0.0001	< 0.0001	< 0.0001	< 0.0001
			R²	0.845		Cultigroupe	Mean	Grouping
			F	29.14		Cay FVPEmS	134	A
			Pr > F	< 0.000		PSFVPEmS	141		B
						PSFVPT	149			C
						CayFVPT	134				A
					LoSto ( µm) : Length of stomata
			R²	0.97		Cultigroupe	Mean	Grouping
			F	203.13		Cay FVPEmS	26.6	A
			Pr > F	< 0.000		PSFVPEmS	33.5		B
						PSFVPT	36.434			C
						CayFVPT	46.6				D
					LoOS (µm) : Length of the ostiole
			R²	0.91		Cultigroupe	Mean	Grouping
			F	54.493		Cay FVPEmS	16.232	A
			Pr > F	< 0.000		PSFVPEmS	19.8		A
						PSFVPT	19			A
						CayFVPT	32				B
					LaOS (µm ) : Width of the ostiole
						Cultigroupe	Mean	Grouping
			R²	0.967		Cay FVPEmS	5.448	A
			F	156.354		CayFVPT	5.87		A
			Pr > F	< 0.000		PSFVPEmS	8.3			B
						PSFVPT	10.484				C
